# 1 **Evolution of $\beta$ -lactamase mediated cefiderocol resistance**

2 Christopher Fröhlich<sup>1</sup>, Vidar Sørum<sup>2</sup>, Nobuhiko Tokuriki<sup>3</sup>, Pål Jarle Johnsen<sup>2</sup>, Ørjan  
3 Samuelsen<sup>2,4</sup>

4

5 <sup>1</sup>Department of Chemistry, UiT The Arctic University of Norway, Tromsø, Norway

6 <sup>2</sup>Department of Pharmacy, UiT The Arctic University of Norway, Tromsø, Norway

7 <sup>3</sup>Michael Smith Laboratories, University of British Columbia, Vancouver, BC, Canada

8 <sup>4</sup>Norwegian National Advisory Unit on Detection of Antimicrobial Resistance,

9 Department of Microbiology and Infection Control, University Hospital of North

10 Norway, Tromsø, Norway

11

12 **Keywords:**  $\beta$ -lactamase, cefiderocol, antibiotic resistance, carbapenemases

13

14 **Running title: Cefiderocol drives the evolution of  $\beta$ -lactamases**

15

16 **Correspondence:** C. Fröhlich, Department of Chemistry, UiT The Arctic University of

17 Norway, 9037 Tromsø, Norway ([christopher.frohlich@uit.no](mailto:christopher.frohlich@uit.no)) or Ø. Samuelsen,

18 Norwegian National Advisory Unit on Detection of Antimicrobial Resistance,

19 Department of Microbiology and Infection Control, University Hospital of North

20 Norway, Tromsø, Norway ([orjan.samuelsen@unn.no](mailto:orjan.samuelsen@unn.no)).

21

22 **Summary:** Despite the reported higher stability of cefiderocol against  $\beta$ -lactamase

23 hydrolysis, we show that the expression of  $\beta$ -lactamases from different Ambler classes

24 significantly contributes to cefiderocol resistance and that these enzymes have the

25 evolutionary potential to evolve towards increasing cefiderocol concentrations.

26 **ABSTRACT**

27 Cefiderocol is a novel siderophore  $\beta$ -lactam with improved hydrolytic stability toward  
28  $\beta$ -lactamases, including carbapenemases, achieved by combining structural moieties  
29 of two clinically efficient cephalosporins, ceftazidime and cefepime. Consequently,  
30 cefiderocol represents a treatment alternative for infections caused by multi-drug  
31 resistant Gram-negatives. Using directed evolution on a wide variety of different  $\beta$ -  
32 lactamases, such as KPC-2 and CTX-M-15 (Ambler class A), NDM-1 (class B), CMY-  
33 2 (class C) and OXA-48 (class D), we studied the role of cefiderocol during  $\beta$ -  
34 lactamase-mediated resistance development. First, we investigated how the  
35 expression of different  $\beta$ -lactamases causes changes in cefiderocol susceptibility. In  
36 a low-copy number vector, we found that OXA-48 and KPC-2 conferred non or  
37 marginal decreases in cefiderocol susceptibility, respectively. On the contrary, CMY-  
38 2, CTX-M-15 and NDM-1 substantially decreased cefiderocol susceptibility by 16-, 8-  
39 and 32-fold, respectively. Second, we determined the evolutionary potential of these  
40 enzymes to adapt to increasing concentrations of cefiderocol. Our data show that with  
41 the acquisition of only 1 to 2 mutations, all  $\beta$ -lactamases were evolvable to further  
42 cefiderocol resistance by 2- (NDM-1, CTX-M-15), 4- (CMY-2), 8- (OXA-48) and 16-  
43 fold (KPC-2). Cefiderocol resistance development was often associated with collateral  
44 susceptibility changes including increased resistance to ceftazidime and ceftazidime-  
45 avibactam as well as functional trade-offs against different  $\beta$ -lactam drugs. Taken  
46 together, contemporary  $\beta$ -lactamases of all Ambler classes can potentially contribute  
47 to cefiderocol resistance development and can acquire mutations allowing them to  
48 adapt to increasing cefiderocol concentration. At the same time, resistance  
49 development caused clinically important cross-resistance, especially against  
50 ceftazidime combinations.

## 51 INTRODUCTION

52 The novel and recently introduced cephalosporin cefiderocol is a promising treatment  
53 option for infections caused by multi-drug resistant and carbapenemase-producing  
54 Gram-negatives based on two distinctive structural features [1]. Firstly, the  
55 cephalosporin molecule is linked to a catechol moiety (siderophore) promoting binding  
56 of iron, and thus facilitating uptake through the bacterial iron transport systems. This  
57 “Trojan horse strategy” leads to increased periplasmic concentrations and avoids  
58 porin-mediated resistance mechanisms [1]. Secondly, the ceftazidime and cefepime  
59 related sidechains of cefiderocol provides improved hydrolytic stability against various  
60  $\beta$ -lactamases including carbapenemases [2, 3] (Supplementary Figure S1). Indeed,  
61 cefiderocol was shown to be hydrolyzed several orders of magnitudes less by various  
62 carbapenem hydrolyzing  $\beta$ -lactamases, such as KPC-3, NDM-1 and VIM-2, compared  
63 to similar  $\beta$ -lactam drugs such as ceftazidime [2]. Clinical resistance to cefiderocol has  
64 mainly been associated with mutations in iron transporter systems [4-6]. However, a  
65 two amino acid deletion in the R2 loop of AmpC of a clinical *Enterobacter* spp. isolate  
66 led to reduced susceptibility towards cefiderocol as well as ceftazidime-avibactam [7,  
67 8]. Moreover, KPC variants conferring increased ceftazidime-avibactam resistance  
68 resulted in cross-resistance against cefiderocol [9]. Further, increased copy number  
69 and expression of *bla*<sub>NDM-5</sub> in *Escherichia coli* was shown to be associated with the  
70 development of cefiderocol resistance [10]. Additionally, the synergistic effects  
71 between cefiderocol with  $\beta$ -lactamase inhibitors indicate that the expression of  $\beta$ -  
72 lactamases might play a crucial role in cefiderocol resistance development [11]. Thus,  
73 there is a clear potential for the selection of new or pre-existing  $\beta$ -lactamase variants  
74 exhibiting increased resistance towards cefiderocol.

75 However, a general understanding of the contribution and evolvability of these  
76 enzymes to changes in bacterial cefiderocol resistance is currently still lacking. Here,  
77 we provide a systematic study addressing this knowledge gap by asking to which  
78 extent, the expression of clinical and contemporary  $\beta$ -lactamases from different  
79 Ambler classes play a role in the evolution of cefiderocol resistance? Moreover, can  
80 the exposure to cefiderocol lead to cross-resistance and re-sensitization (collateral  
81 sensitivity) towards other  $\beta$ -lactams and  $\beta$ -lactam-inhibitor combinations? To this end,  
82 five  $\beta$ -lactamases, KPC-2 and CTX-M-15 (Ambler class A), NDM-1 (class B), CMY-2  
83 (class C), and OXA-48 (class D) were expressed in *Escherichia coli* using a low-copy  
84 number vector system (~15 copies per cell) since these  $\beta$ -lactamases are often  
85 plasmid-associated [12]. First, changes in susceptibility due to the expression of  $\beta$ -  
86 lactamases were analyzed by determining the inhibitory concentration 50% ( $IC_{50}$ ) and  
87 the standard minimum inhibitory concentration (MIC) against a panel of different  $\beta$ -  
88 lactams. Next, we used directed evolution to probe the evolutionary potential of these  
89  $\beta$ -lactamases by constructing mutational libraries and selecting clones with increased  
90 cefiderocol resistance. We show that  $\beta$ -lactamases of various Ambler classes affect  
91 cefiderocol susceptibility and demonstrate evolvability to further cefiderocol  
92 resistance, which is often associated with collateral effects.

## 93 MATERIALS AND METHODS

### 94 Antibiotics and other agents

95 Cefiderocol was purchased from Shionogi (Osaka, Japan). If not otherwise stated,  
96 other antibiotics and media were purchased from Sigma-Aldrich (St. Louis, MO, USA).

97 Strains used and constructed in this study are summarized in Supplementary Table 1.

98 Restriction enzymes, DNA polymerases and T4 ligase were purchased from

99 ThermoFisher (Waltham, MA, USA). Primer sequences used in this study are

100 summarized in Supplementary Table 2.

### 101 Strain construction

102 Previously, we constructed a low-copy number vector (pUN) with a chloramphenicol

103 resistance marker (pA15 origin with ~10 copies per cell) [13, 14]. The chloramphenicol

104 marker carried a *Nco*I restriction site which was silenced by site directed mutagenesis

105 using GoldenGate cloning. In brief, whole vector amplification was performed with

106 Phusion polymerase and primers P9/P10 (Supplementary Table 2). The PCR product

107 was digested using *Lgu*I and *Dpn*I. Recirculation was performed using a T4 ligase and

108 MP21-05 (*E. coli* E.cloni<sup>®</sup> 10G) was transformed with the ligated product. Clones were

109 selected on LB plates containing 25 mg/L chloramphenicol and verified by Sanger

110 sequencing (Genewiz, Leipzig, Germany).

111 This modified vector allowed us to sub-clone all  $\beta$ -lactamases, using a *Nco*I

112 restriction site at the start codon and the *Xho*I restriction site directly after the stop

113 codon. The gene sequences of *bla*<sub>CMY-2</sub>, *bla*<sub>CTX-M-15</sub>, and *bla*<sub>NDM-1</sub> were synthesized by

114 Genewiz (Leipzig, Germany) according to the gene sequences NG\_048935.1,

115 NG\_048814.1 and NG\_049326.1, respectively. *Bla*<sub>OXA-48</sub> and *bla*<sub>KPC-2</sub> originated from

116 *E. coli* 50579417 and *Klebsiella pneumoniae* K47-25, respectively [15, 16].

117 Primers were designed, replacing the native *NdeI* restriction site at the start  
118 codon of the  $\beta$ -lactamase genes with a *NcoI* cutting site by inserting a glycine after the  
119 starting methionine amino acid (Supplementary Table 2). For sub-cloning, the vector  
120 backbone was amplified using the primers P3/P4 and Phusion polymerase. Similarly,  
121 *bla*<sub>OXA-48</sub> (P1/P2), *bla*<sub>KPC-2</sub> (P41/42), *bla*<sub>CMY-2</sub> (P52/53), *bla*<sub>CTX-M-15</sub> (P48/49) and *bla*<sub>NDM-</sub>  
122 <sub>1</sub> (P50/51) were amplified, followed by a *NcoI/XhoI* digestion. The digested vector  
123 backbone and insert were T4 ligated and MP21-05 was transformed with the ligated  
124 product. The *NcoI* and *NotI* restriction site within *bla*<sub>KPC-2</sub> were removed using primers  
125 P43F/R and P44F/R, respectively, and GoldenGate cloning as described above.

126 After selective plating on cefiderocol agar plates, mutant alleles were amplified  
127 using primers P7/P8, sub-cloned into an isogenic pUN vector backbone and  
128 transformed into MP21-05 to exclude mutational effects outside of the target gene.  
129 The corresponding single and double mutants, which could not be sub-cloned directly,  
130 were constructed by GoldenGate cloning, as described above, using the primers in  
131 Supplementary Table 2. All changes were confirmed by Sanger sequencing.

### 132 **Directed evolution and selective plating**

133 Mutational libraries were constructed by error-prone PCR using 10 ng vector DNA,  
134 GoTag DNA polymerase (Promega, Madison, WI, USA), 25 mM MgCl<sub>2</sub> (Promega), 10  
135  $\mu$ M of primers P7/P8 and either 50  $\mu$ M oxo-dGTP or 1  $\mu$ M dPTP. PCR products were  
136 DpnI digested for 1 h at 37°C. 5 ng of each product was used for a second PCR, which  
137 was performed as described above, but without mutagenic nucleotides. The second  
138 PCR product was then digested using *NcoI* and *XhoI* and ligated in a 1:3 ratio with the  
139 digested and purified vector backbone. MP21-05 was transformed with the ligation  
140 mixture, recovered in LB broth for 1 h at 37°C and plated on 25 mg/L chloramphenicol  
141 LB agar plates. Library sizes were determined by cell counts and mutation frequencies

142 were determined using Sanger sequencing (Genewiz, Leipzig, Germany). Sequences  
143 were aligned using ESPript (v. 3) [17]. The MP21-05 cultures harboring the  
144 corresponding mutational libraries of  $\beta$ -lactamase genes were plated on LB agar  
145 plates containing increasing concentrations of cefiderocol and grown over night at  
146 37°C. Colonies grown were recovered on plates with the highest cefiderocol  
147 concentration and their genotype characterized by Sanger sequencing (Genewiz,  
148 Leipzig, Germany).

#### 149 **Dose-response curves and MIC determination**

150 Dose response curves were determined and their  $IC_{50}$  values calculated using  
151 GraphPad Prism (v. 9) as previously published [14]. MICs were determined by broth  
152 microdilution using in-house-designed premade Sensititre microtiter plates (TREK  
153 Diagnostic Systems/Thermo Fisher Scientific, East Grinstead, UK) according to the  
154 manufacturer's instruction. The plates were incubated statically for 20 h at 37°C.

## 155 **RESULTS**

### 156 **Evolution of $\beta$ -lactamase mediated cefiderocol resistance**

157 To comparatively study the effect of different  $\beta$ -lactamases on cefiderocol resistance  
158 development, we expressed five  $\beta$ -lactamase genes (*bla*<sub>CMY-2</sub>, *bla*<sub>CTX-M-15</sub>, *bla*<sub>NDM-1</sub>,  
159 *bla*<sub>OXA-48</sub> and *bla*<sub>KPC-2</sub>) in a low-copy number vector in an isogenic *E. coli* E.cloni® 10G  
160 (MP21-05) background and determined changes in cefiderocol MICs (Table 1). We  
161 found that the expression of OXA-48 and KPC-2 conferred non or marginal (4-fold)  
162 decreases in susceptibility towards cefiderocol, respectively. In contrast, CMY-2, CTX-  
163 M-15 and NDM-1 substantially decreased cefiderocol susceptibility by 16-, 8- and 32-  
164 fold, respectively. Thus, our data show that the expression of contemporary and  
165 clinically relevant  $\beta$ -lactamases can be critical and contribute to cefiderocol resistance,  
166 which is in-line with previous observations [9, 11, 18].

167 Further, the observed effect on cefiderocol susceptibility by the  $\beta$ -lactamases  
168 suggests an evolutionary potential for the adaption toward increasing cefiderocol  
169 concentrations. To study this, we created mutational libraries, comprising at least 5000  
170 mutants of each  $\beta$ -lactamase, using error prone PCR with an average mutation rate of  
171 1 to 2 mutations per gene. Mutational libraries were selected on agar plates with  
172 cefiderocol concentrations 2 to 16-fold above their wild-type MICs. Up to eight colonies  
173 were randomly selected per  $\beta$ -lactamase from plates containing the highest  
174 cefiderocol concentration, and changes in the target genes were characterized by  
175 Sanger sequencing. Among isolated variants, we selected a subset of single and  
176 double mutants, with amino acid changes either close to the active site, in structural  
177 elements important in substrate specificity (e.g.,  $\Omega$  loop) or described in naturally  
178 evolving variants for subsequent characterization (Supplementary Figures 2 to 6): two  
179 OXA-48 double mutants (F72L/S212A and F156S/T213A), three KPC-2 single



180 mutants (D179A/G/Y), two single (S308R and L317P) and one CMY-2 double mutant  
181 (S308N/D309G), two NDM-1 double mutants (Q119R/D267G and Q94R/Q119H), as  
182 well as one single (E271K) and one double CTX-M-15 mutant (N192K/S220R). In  
183 addition, to identify the contribution of each individual amino acid change within the  
184 selected double mutants, the corresponding single mutants were constructed  
185 (Supplementary Table S1).

186         Standard MIC assays have a limited resolution and may not capture marginal  
187 changes in susceptibility that, from an evolutionary perspective, have shown to be  
188 crucial for the selection of antibiotic resistance [14, 19]. To provide an increased  
189 resolution to our susceptibility measurements, we determined the cefiderocol  
190 susceptibility changes using dose response curves (Figure 1) and calculated the  
191 corresponding  $IC_{50}$  values (Table 2). We found that, with the acquisition of only one  
192 mutation, all  $\beta$ -lactamases evolved to confer significantly increased resistance (herein  
193 defined as decreased susceptibility compared to wild-type allele) against cefiderocol  
194 where  $IC_{50}$  values typically increased by 2 to 8-fold (Brown-Forsythe and Welch  
195 ANOVAs for samples with different standard deviations, see Supplementary Table 3).  
196 Interestingly, our data also show synergy between different single mutants during the  
197 evolution of OXA-48 (F72L/S212A and F156S/T213A), CMY-2 (S308N/D309G) and  
198 NDM-1 (Q119R/D267G) where the  $IC_{50}$  values, conferred by the double mutants, were  
199 significantly higher than either single mutant alone (Supplementary Table 3). On the  
200 contrary, CTX-M-15:E192K and NDM-1:Q94R did not contribute to cefiderocol  
201 resistance development in neither single nor double mutant and are thus likely to be  
202 hitch-hikers.

203         To assess the  $IC_{50}$  changes in a more clinical microbiological context, we further  
204 performed standard MIC susceptibility assays. Using this approach, significant

205 cefiderocol MIC differences (>2-fold changes) were only observed for OXA-48, KPC-  
206 2 and CMY-2 mutants compared to their wild-type enzymes (Table 1). On the contrary,  
207 all mutants of CTX-M-15 and NDM-1 displayed unchanged cefiderocol MIC values,  
208 despite their significant changes in  $IC_{50}$ . Taken together, tested  $\beta$ -lactamases of all  
209 Ambler classes can evolve to confer decreased susceptibility against cefiderocol,  
210 judged by their  $IC_{50}$  values, while exhibiting cryptic phenotypes from a clinical  
211 microbiological point of view (no changes in MIC). However, these marginal changes  
212 in resistance have been shown to be highly selectable, especially under low or  
213 suboptimal  $\beta$ -lactam concentrations [14] and can provide a gateway for developing  
214 clinical resistance [19-22].

#### 215 **Cefiderocol resistance display changes in collateral susceptibility**

216 Cefiderocol is an oxyimino cephalosporin combining chemical moieties of ceftazidime  
217 and cefepime (Supplementary Figure 1). Evolution of  $\beta$ -lactamase mediated  
218 resistance towards ceftazidime and ceftazidime combinations with  $\beta$ -lactamase  
219 inhibitors, such as avibactam, has been reported to cause collateral changes, e.g.,  
220 cross-resistance and collateral sensitivity in different enzymes, including KPC and  
221 OXA-48 [9, 13]. To understand whether collateral effects occur during the evolution  
222 towards cefiderocol resistance, we determined MICs against a panel of different  $\beta$ -  
223 lactams, covering all  $\beta$ -lactam classes (Table 1). Our MIC data show that a 4 to 8-fold  
224 increase in cefiderocol MIC in OXA-48 and KPC-2 mutants caused the development  
225 of strong cross-resistance against ceftazidime, with ceftazidime MICs elevated by 4-  
226 to 16-fold. In addition, all three selected KPC-2 mutants exhibited cross-resistance  
227 with >8- to >16-fold increased MIC values against ceftazidime-avibactam. These  
228 observations are in-line with previous studies where the selection of KPC-2 on  
229 ceftazidime-avibactam caused the emergence of KPC-2 mutants conferring cross-

230 resistance against cefiderocol [9]. Similarly, the selection of OXA-48 against  
231 ceftazidime resulted in mutants identical or similar (e.g., F72L and F156C/V) to the  
232 ones identified in this study [14] suggesting that the exposure to either ceftazidime or  
233 cefiderocol causes functional cross-resistance in both KPC-2 and OXA-48. No effect  
234 of the OXA-48 mutations on ceftazidime-avibactam resistance development was  
235 found and cross-resistance to other cephalosporins, such as cefepime and  
236 cefotaxime, was not detected. In addition, no cross-resistance was observed towards  
237 ceftazidime-avibactam in CMY-2 and CTX-M-15.

238 We also observed that evolved cefiderocol resistance comes with a range of  
239 significant evolutionary trade-offs. For all three carbapenemases (OXA-48, KPC-2 and  
240 NDM-1), we found significant collateral sensitivities towards carbapenems. This was  
241 particularly true for the serine carbapenemases OXA-48 and KPC-2, where cefiderocol  
242 resistance development caused strong collateral sensitivity effects with reduced  
243 carbapenem MICs. The strongest effect was seen for meropenem with a MIC  
244 reduction of up to 32-fold in the KPC mutants. A smaller collateral sensitivity effect  
245 was observed within the NDM-1:Q119R/D267G mutant where the meropenem MIC  
246 was reduced by 8-fold. In addition, in both OXA-48 and KPC-2, mutations resulted in  
247 a >32-fold decrease in piperacillin-tazobactam MIC. Other collateral sensitivity  
248 changes with MIC reductions >2-fold include ceftazidime (CTX-M-15:S220R and  
249 E271K), cefotaxime (KPC-2:D179A/G, CTX-M-15:S220R and CTX-M-15:E271K) and  
250 aztreonam (CMY-2:L317P, KPC-2 D179x and CTX-M-15:S220R).

## 251 **DISCUSSION**

252 There have been observations that  $\beta$ -lactamases may impact the susceptibility and  
253 evolution of cefiderocol resistance [7-11, 18]. Indeed, we showed that the expression  
254 of wild-type  $\beta$ -lactamases from various Ambler classes can significantly alter  
255 cefiderocol susceptibility in *E. coli* (Table 1). Beyond that, we probed the evolutionary  
256 potential of all tested  $\beta$ -lactamases to adapt toward increasing cefiderocol resistance  
257 (Table 2). With the acquisition of only one to two mutations, all  $\beta$ -lactamases evolved  
258 to confer increased resistance against cefiderocol. Interestingly, we observed that the  
259 extent by which cefiderocol resistance developed was highly dependent on the initial  
260 wild-type  $\beta$ -lactamase activity. Enzymes with an initial low-level resistance profile  
261 against cefiderocol, such as OXA-48 and KPC-2, showed the highest improvement.  
262 On the contrary, enzymes with an initial higher level of activity against cefiderocol,  
263 such as CMY-2, NDM-1, and CTX-M-15, demonstrated substantial less improvements  
264 (Table 1 and 2). Indeed, selected mutants for these enzymes did not significantly  
265 improve cefiderocol resistance judged by a standard MIC assay. However, we found  
266 that most of the mutants were able to significantly improve resistance measured in an  
267  $IC_{50}$  set-up. Such cryptic changes in susceptibility have been previously described to  
268 play an important role in the evolution of  $\beta$ -lactamases and are highly selectable,  
269 especially under sub-optimal  $\beta$ -lactam concentrations [14, 19]. We acknowledge the  
270 fact that only single and double mutants were studied, and further work needs to be  
271 done to explore the full evolutionary potential of these enzymes.

272 Evolution of  $\beta$ -lactamase mediated resistance to ceftazidime-avibactam and  
273 cefepime has been shown to concurrently cause cross-resistance or reduced  
274 susceptibility to cefiderocol [7-9]. Here, we observed a similar phenomenon where  
275 cefiderocol and ceftazidime resistance increased parallelly to the same extent within

276 OXA-48 and KPC-2 (Table 1) and ceftazidime-avibactam resistance in KPC-2. No  
277 cross-resistance against other oxyimino cephalosporins or  $\beta$ -lactams was identified  
278 indicating that the structural similarity between cefiderocol and ceftazidime plays an  
279 important role for the development of cross-resistance.

280 In contrast, widespread collateral sensitivity against other  $\beta$ -lactams, including  
281 carbapenems and penicillin-inhibitor combinations, was found in mutants with  
282 increased cefiderocol resistance (Table 1). We observed the strongest trade-offs  
283 during cefiderocol resistance development of OXA-48 and KPC-2 against  
284 carbapenems and aztreonam (KPC-2). Such collateral sensitivity/functional trade-offs  
285 can open the path for alternative treatment strategies, and they have been  
286 successfully exploited in the clinical setting with a carbapenem- $\beta$ -lactamase inhibitor  
287 combination against ceftazidime-avibactam and cefiderocol resistant *K. pneumoniae*  
288 harboring the natural KPC-31[23]. However, the molecular causes of these collateral  
289 effects remain poorly understood. A study on the ceftazidimase OXA-163, which  
290 possesses lower carbapenem activity compared to OXA-48, suggests that molecular  
291 evolution shapes drug incompatibility, resulting in multiple binding modes that give rise  
292 to these trade-offs.

293 F72 and F156 in OXA-48 have been previously characterized as mutational hot-  
294 spot allowing for marginally increased ceftazidime hydrolysis [13]. Here, we re-  
295 identified mutations at these positions (F72L and F156S) showing their involvement in  
296 cefiderocol resistance development. While OXA-48:F72L was reported in  
297 environmental samples [24, 25], most characterized OXA-48-like variants, which  
298 confer increased ceftazidime resistance, exhibit multiple amino acid deletions within  
299 the  $\beta$ 5- $\beta$ 6 loop [26]. It remains to be determined whether these variants, such as OXA-  
300 163, also confer increased resistance against cefiderocol. In contrast, the D179x

301 mutations within the  $\Omega$ -loop of KPC-type have been described in naturally evolving  
302 enzymes (KPC-78, KPC-86 and KPC-31; Supplementary Figure 3). For CMY-2, amino  
303 acid changes clustered round the R2 loop which has been shown to be host to the R2-  
304 side chain of  $\beta$ -lactam drugs [27]. Consequently, mutations and deletions within the  
305 R2 loop have been associated with increased resistance towards cephalosporins,  
306 such as cefepime and ceftazidime [28, 29]. Also here, several of the  
307 mutations/positions reported in this study have been associated with naturally evolving  
308 variants (e.g., CMY-133 and CMY-17). This underlines the fact that variants conferring  
309 improved cefiderocol resistance are already present in clinical isolates. In addition,  
310 these enzymes are encoded on transferable plasmids allowing these genes to spread,  
311 a process that may be facilitated by the increasing usage of cefiderocol.

312 Taken together, this study provides a proof-of-principle showing that the  
313 expression of  $\beta$ -lactamases from various Ambler classes can substantially contribute  
314 to cefiderocol resistance and that many  $\beta$ -lactamases possess the evolutionary  
315 potential to adapt to increasing cefiderocol concentrations under laboratory conditions.  
316 Similar to other cephalosporins, this evolutionary process comes with collateral effects  
317 against  $\beta$ -lactam drugs including both cross-resistance and re-sensitization.

Table 1: MIC determination. Enzymes are expressed in *E. coli* E.cloni<sup>®</sup> (MP21-05) and MIC values are reported in mg/L.

|                | Variants    | MP strain no. | CFD  | CAZ   | CZA   | C/T   | CTX   | FEP   | AZT   | MEM  | IPM  | ERT   | MEV   | IMR   | TZP | TEM |
|----------------|-------------|---------------|------|-------|-------|-------|-------|-------|-------|------|------|-------|-------|-------|-----|-----|
| <i>E. coli</i> | -           | 21-05         | 0.06 | <0.25 | <0.12 | <0.25 | <0.12 | <0.12 | <0.25 | 0.03 | 0.25 | 0.12  | <0.06 | 0.5   | <1  | <8  |
| CTX-M-15       | wt          | 24-80         | 0.5  | 8     | <0.12 | <0.25 | >16   | 2     | 8     | 0.03 | 0.25 | <0.12 | <0.06 | 0.25  | <1  | 16  |
|                | N192K       | 29-15         | 1    | 4     | <0.12 | <0.25 | >16   | 2     | 8     | 0.03 | 0.25 | <0.12 | <0.06 | 0.12  | <1  | <8  |
|                | S220R       | 29-16         | 0.25 | 0.5   | <0.12 | <0.25 | 1     | <0.12 | 1     | 0.03 | 0.12 | <0.12 | 0.25  | 0.12  | <1  | <8  |
|                | E271K       | 29-07         | 0.5  | 2     | <0.12 | <0.25 | 4     | 0.25  | 4     | 0.03 | 0.25 | <0.12 | <0.06 | <0.12 | <1  | <8  |
|                | N192K/S220R | 29-08         | 1    | 4     | <0.12 | <0.25 | >16   | 1     | 16    | 0.03 | 0.25 | <0.12 | <0.06 | 0.12  | <1  | <8  |
| KPC-2          | wt          | 24-44         | 0.25 | 2     | <0.12 | 1     | 2     | 0.5   | 8     | 1    | 2    | 1     | <0.06 | 0.25  | >32 | <8  |
|                | D179A       | 24-69         | 1    | 16    | 1     | 0.5   | 0.25  | <0.12 | <0.25 | 0.03 | 0.25 | 0.12  | <0.06 | 0.25  | <1  | <8  |
|                | D179G       | 24-71         | 2    | 16    | 1     | 0.5   | 0.5   | 0.25  | <0.25 | 0.06 | 0.25 | 0.12  | <0.06 | 0.25  | <1  | <8  |
|                | D179Y       | 24-70         | 2    | 32    | 2     | 1     | 2     | 0.5   | <0.25 | 0.03 | 0.25 | <0.12 | <0.06 | 0.25  | <1  | <8  |
| NDM-1          | wt          | 24-81         | 2    | >32   | >32   | >16   | >16   | 4     | <0.25 | 4    | 4    | 2     | 4     | 2     | >32 | 16  |
|                | Q94R        | 29-18         | 2    | >32   | >32   | >16   | >16   | 4     | <0.25 | 2    | 4    | 1     | 2     | 4     | >32 | 16  |
|                | Q119R       | 29-10         | 2    | >32   | >32   | >16   | >16   | 4     | <0.25 | 2    | 4    | 0.5   | 4     | 4     | 32  | 64  |
|                | D267G       | 29-17         | 2    | >32   | >32   | >16   | >16   | 4     | <0.25 | 1    | 4    | 0.5   | 1     | 4     | >32 | 16  |
|                | Q119R/D267G | 29-09         | 2    | >32   | >32   | >16   | >16   | 4     | <0.25 | 0.5  | 2    | 0.25  | 0.25  | 2     | >32 | 64  |
|                | Q94R/Q119H  | 29-11         | 2    | >32   | >32   | >16   | >16   | 4     | <0.25 | 2    | 8    | 0.5   | 0.5   | 2     | >32 | 32  |
| CMY-2          | wt          | 12-69         | 0.5  | 4     | <0.12 | <0.25 | 2     | <0.12 | 0.5   | 0.03 | 0.25 | 0.12  | <0.06 | 0.25  | <1  | <8  |
|                | S308R       | 29-04         | 2    | 8     | <0.12 | <0.25 | 2     | 0.25  | 0.5   | 0.03 | 0.25 | <0.12 | <0.06 | 0.12  | <1  | <8  |
|                | S308N       | 29-13         | 1    | 4     | <0.12 | <0.25 | 2     | 0.25  | 0.5   | 0.03 | 0.25 | <0.12 | <0.06 | 0.12  | <1  | <8  |
|                | D309G       | 29-14         | 0.5  | 4     | <0.12 | <0.25 | 2     | <0.12 | 0.5   | 0.03 | 0.25 | 0.12  | <0.06 | 0.25  | <1  | <8  |
|                | L317P       | 29-06         | 1    | 8     | <0.12 | <0.25 | 2     | 0.25  | <0.25 | 0.03 | 0.12 | <0.12 | <0.06 | 0.5   | <1  | <8  |
|                | S308N/D309G | 29-05         | 2    | 8     | <0.12 | <0.25 | 2     | 0.5   | 0.5   | 0.03 | 0.12 | 0.12  | <0.06 | 0.25  | <1  | <8  |
| OXA-48         | wt          | 21-02         | 0.06 | <0.25 | <0.12 | <0.25 | <0.12 | <0.12 | <0.25 | 0.25 | 1    | <0.12 | 0.12  | 1     | 32  | 64  |
|                | F72L/S212A  | 22-37         | 0.5  | 1     | <0.12 | <0.25 | <0.12 | <0.12 | <0.25 | 0.03 | 0.25 | <0.12 | <0.06 | 0.25  | <1  | <8  |
|                | F156S/T213A | 24-41         | 0.5  | 2     | <0.12 | <0.25 | <0.12 | <0.12 | <0.25 | 0.06 | 0.5  | <0.12 | <0.06 | 0.25  | <1  | 32  |

wt: wild-type; CFD: cefiderocol; CAZ: ceftazidime; CZA: ceftazidime/avibactam; C/T: ceftolozane/tazobactam; CTX: cefotaxime; FEP: cefepime; AZT: aztreonam; MEM: meropenem; IPM: imipenem; ERT: ertapenem; MEV: meropenem/vaborbactam; IMR: imipenem/relebactam; TZP: piperacillin/tazobactam; TEM: temocillin. The concentrations of avibactam, tazobactam and relebactam were fixed at 4 mg/L and 8 mg/L for vaborbactam.

Table 2:  $IC_{50}$  determination. SEM represents the standard error based on at least 3 replicates.

| MP Strain no. | Name                    | $IC_{50}$<br>(mg/L) | SEM<br>(mg/L) |
|---------------|-------------------------|---------------------|---------------|
| MP21-05       | <i>E. coli</i> E.cloni® | 0.060               | 0.004         |
| MP24-80       | wtCTX-M-15              | 0.653               | 0.075         |
| MP29-15       | N192K                   | 0.731               | 0.08          |
| MP29-16       | S220R                   | 1.122               | 0.083         |
| MP29-07       | E271K                   | 1.339               | 0.08          |
| MP29-08       | N192K/S220R             | 1.16                | 0.142         |
| MP24-44       | wtKPC-2                 | 0.102               | 0.004         |
| MP24-69       | D179A                   | 0.338               | 0.034         |
| MP24-71       | D179G                   | 0.299               | 0.027         |
| MP24-70       | D179Y                   | 0.558               | 0.037         |
| MP24-81       | wtNDM-1                 | 1.087               | 0.172         |
| MP29-10       | Q94R                    | 1.126               | 0.312         |
| MP29-17       | Q119R                   | 4.448               | 0.253         |
| MP29-18       | D267G                   | 2.489               | 0.323         |
| MP29-09       | Q94R/Q119H              | 3.683               | 0.238         |
| MP29-11       | Q119R/D267G             | 5.284               | 0.418         |
| MP12-69       | wtCMY-2                 | 0.216               | 0.031         |
| MP29-04       | S308R                   | 1.677               | 0.112         |
| MP29-13       | S308N                   | 1.466               | 0.108         |
| MP29-14       | D309G                   | 0.807               | 0.083         |
| MP29-06       | L317P                   | 1.596               | 0.102         |
| MP29-05       | S308N/D309G             | 2.06                | 0.096         |
| MP21-01       | wtOXA-48                | 0.058               | 0.003         |
| MP22-05       | F72L                    | 0.076               | 0.005         |
| MP22-19       | S212A                   | 0.066               | 0.005         |
| MP22-06       | F156S                   | 0.148               | 0.016         |
| MP22-07       | T213A                   | 0.055               | 0.004         |
| MP22-37       | F72L/S212A              | 0.237               | 0.021         |
| MP24-41       | F156S/T213A             | 0.381               | 0.033         |

wt: wild-type



## **FUNDING**

PJJ was supported by UiT The Arctic University of Norway and the Northern Norway Regional Health Authority (SFP1292-16/HNF1586-21) and JPI-EC-AMR (Project 271,176/H10).

## **ACKNOLEGEMENTS**

We are very grateful to Hanna-Kirsti Schrøder Leiros, Department of Chemistry, UiT The Arctic University of Norway for providing the cefiderocol used in this study.

## **CONFLICT OF INTEREST**

None to declare.

## REFERENCES

1. Sato T, Yamawaki K. Cefiderocol: Discovery, Chemistry, and *In Vivo* Profiles of a Novel Siderophore Cephalosporin. *Clin Infect Dis* **2019**; 69(Suppl 7): S538-S43.
2. Ito-Horiyama T, Ishii Y, Ito A, et al. Stability of Novel Siderophore Cephalosporin S-649266 against Clinically Relevant Carbapenemases. *Antimicrob Agents Chemother* **2016**; 60(7): 4384-6.
3. Poirel L, Kieffer N, Nordmann P. Stability of cefiderocol against clinically significant broad-spectrum oxacillinases. *Int J Antimicrob Agents* **2018**; 52(6): 866-7.
4. Klein S, Boutin S, Kocer K, et al. Rapid development of cefiderocol resistance in carbapenem-resistant *Enterobacter cloacae* during therapy is associated with heterogeneous mutations in the catecholate siderophore receptor cira. *Clin Infect Dis* **2021**.
5. McElheny CL, Fowler EL, Iovleva A, Shields RK, Doi Y. *In Vitro* Evolution of Cefiderocol Resistance in an NDM-Producing *Klebsiella pneumoniae* Due to Functional Loss of CirA. *Microbiol Spectr* **2021**; 9(3): e0177921.
6. Malik S, Kaminski M, Landman D, Quale J. Cefiderocol Resistance in *Acinetobacter baumannii*: Roles of  $\beta$ -Lactamases, Siderophore Receptors, and Penicillin Binding Protein 3. *Antimicrob Agents Chemother* **2020**; 64(11).
7. Kawai A, McElheny CL, Iovleva A, et al. Structural Basis of Reduced Susceptibility to Ceftazidime-Avibactam and Cefiderocol in *Enterobacter cloacae* Due to AmpC R2 Loop Deletion. *Antimicrob Agents Chemother* **2020**; 64(7).

8. Shields RK, Iovleva A, Kline EG, Kawai A, McElheny CL, Doi Y. Clinical Evolution of AmpC-Mediated Ceftazidime-Avibactam and Cefiderocol Resistance in *Enterobacter cloacae* Complex Following Exposure to Cefepime. *Clin Infect Dis* **2020**; 71(10): 2713-6.
9. Hobson CA, Cointe A, Jacquier H, et al. Cross-resistance to cefiderocol and ceftazidime-avibactam in KPC  $\beta$ -lactamase mutants and the inoculum effect. *Clin Microbiol Infect* **2021**; 27(8): 1172 e7- e10.
10. Simner PJ, Mostafa HH, Bergman Y, et al. Progressive Development of Cefiderocol Resistance in *Escherichia coli* During Therapy Is Associated with Increased *bla*<sub>NDM-5</sub> Copy Number and Gene Expression. *Clin Infect Dis* **2021**.
11. Mushtaq S, Sadouki Z, Vickers A, Livermore DM, Woodford N. *In Vitro* Activity of Cefiderocol, a Siderophore Cephalosporin, against Multidrug-Resistant Gram-Negative Bacteria. *Antimicrob Agents Chemother* **2020**; 64(12).
12. Sambrook J, Fritsch EF, Maniatis T. *Molecular Cloning: A Laboratory Manual*. 2nd ed: Cold Spring Harbor, N.Y: Cold Spring Harbor Laboratory Press, **1989**.
13. Fröhlich C, Sørnum V, Thomassen AM, Johnsen PJ, Leiros HS, Samuelsen Ø. OXA-48-Mediated Ceftazidime-Avibactam Resistance Is Associated with Evolutionary Trade-Offs. *mSphere* **2019**; 4(2).
14. Fröhlich C, Gama JA, Harms K, et al. Cryptic  $\beta$ -Lactamase Evolution Is Driven by Low  $\beta$ -Lactam Concentrations. *mSphere* **2021**; 6(2).
15. Di Luca MC, Sørnum V, Starikova I, et al. Low biological cost of carbapenemase-encoding plasmids following transfer from *Klebsiella pneumoniae* to *Escherichia coli*. *J Antimicrob Chemother* **2017**; 72(1): 85-9.

16. Samuelsen Ø, Naseer U, Karah N, et al. Identification of *Enterobacteriaceae* isolates with OXA-48 and coproduction of OXA-181 and NDM-1 in Norway. *J Antimicrob Chemother* **2013**; 68(7): 1682-5.
17. Robert X, Gouet P. Deciphering key features in protein structures with the new ENDscript server. *Nucleic Acids Res* **2014**; 42(Web Server issue): W320-4.
18. Nurjadi D, Kocer K, Chanthalangsy Q, Klein S, Heeg K, Boutin S. New Delhi metallo- $\beta$ -lactamase facilitates the emergence of cefiderocol resistance in *Enterobacter cloacae*. *Antimicrob Agents Chemother* **2021**: AAC0201121.
19. Baquero F. Low-level antibacterial resistance: a gateway to clinical resistance. *Drug Resist Updat* **2001**; 4(2): 93-105.
20. Baquero F, Negri MC. Selective compartments for resistant microorganisms in antibiotic gradients. *Bioessays* **1997**; 19(8): 731-6.
21. Baquero F, Negri MC, Morosini MI, Blazquez J. Selection of very small differences in bacterial evolution. *Int Microbiol* **1998**; 1(4): 295-300.
22. Baquero F, Negri MC, Morosini MI, Blazquez J. Antibiotic-selective environments. *Clin Infect Dis* **1998**; 27 Suppl 1: S5-11.
23. Tiseo G, Falcone M, Leonildi A, et al. Meropenem-Vaborbactam as Salvage Therapy for Ceftazidime-Avibactam-, Cefiderocol-Resistant ST-512 *Klebsiella pneumoniae*-Producing KPC-31, a D179Y Variant of KPC-3. *Open Forum Infect Dis* **2021**; 8(6): ofab141.
24. Tacao M, Correia A, Henriques IS. Low Prevalence of Carbapenem-Resistant Bacteria in River Water: Resistance Is Mostly Related to Intrinsic Mechanisms. *Microb Drug Resist* **2015**; 21(5): 497-506.

25. Tacao M, Silva I, Henriques I. Culture-independent methods reveal high diversity of OXA-48-like genes in water environments. *J Water Health* **2017**; 15(4): 519-25.
26. Pitout JDD, Peirano G, Kock MM, Strydom KA, Matsumura Y. The Global Ascendency of OXA-48-Type Carbapenemases. *Clin Microbiol Rev* **2019**; 33(1).
27. Jacoby GA. AmpC  $\beta$ -lactamases. *Clin Microbiol Rev* **2009**; 22(1): 161-82, Table of Contents.
28. Kim JY, Jung HI, An YJ, et al. Structural basis for the extended substrate spectrum of CMY-10, a plasmid-encoded class C  $\beta$ -lactamase. *Mol Microbiol* **2006**; 60(4): 907-16.
29. Dona V, Scheidegger M, Pires J, Furrer H, Atkinson A, Babouee Flury B. Gradual in vitro Evolution of Cefepime Resistance in an ST131 *Escherichia coli* Strain Expressing a Plasmid-Encoded CMY-2  $\beta$ -Lactamase. *Front Microbiol* **2019**; 10: 1311.
30. Ambler RP, Coulson AF, Frere JM, et al. A standard numbering scheme for the class A  $\beta$ -lactamases. *Biochem J* **1991**; 276 ( Pt 1): 269-70.
31. Garau G, Garcia-Saez I, Bebrone C, et al. Update of the standard numbering scheme for class B  $\beta$ -lactamases. *Antimicrob Agents Chemother* **2004**; 48(7): 2347-9.

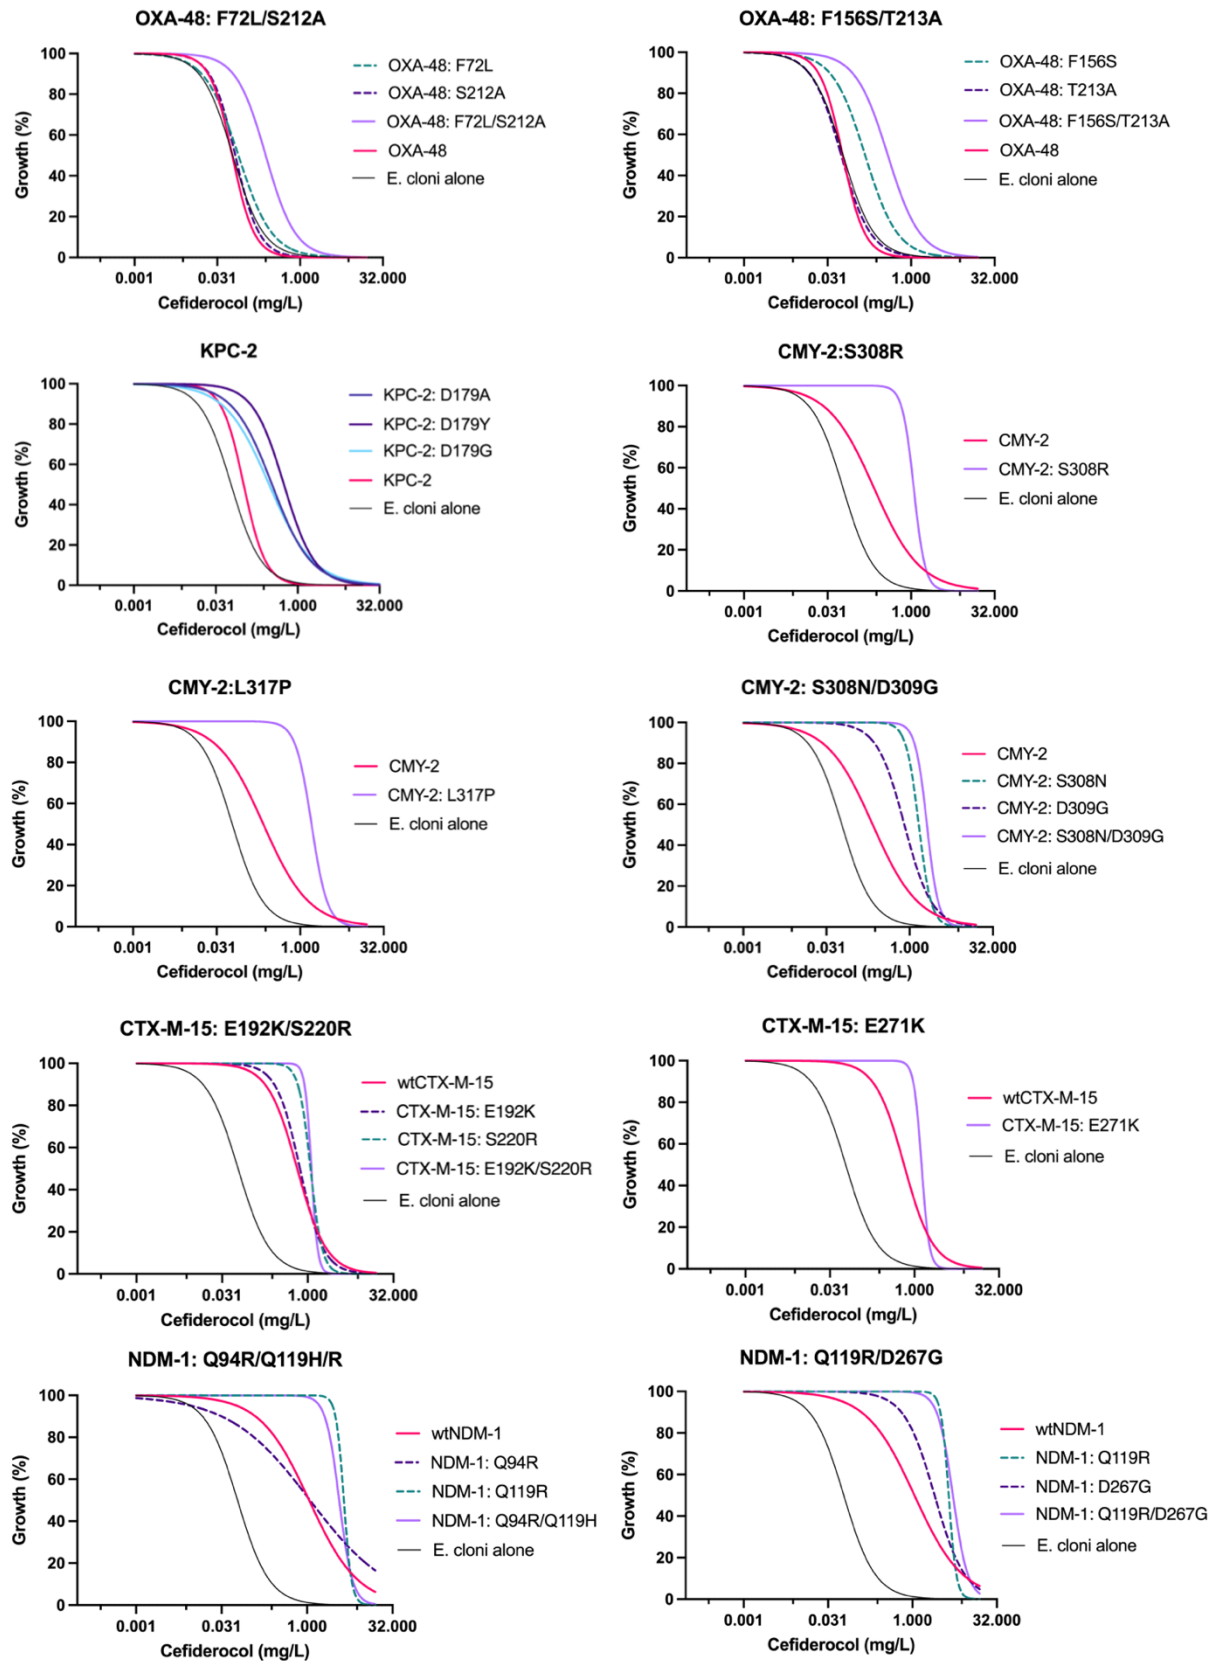

Figure 1: Cefiderocol dose-response curves.
